# Supplementary material for: Improved performance of immobilized laccase for catalytic degradation of synthetic dyes using redox mediators
Source: Royal Society of Chemistry journal article supplement (doi:10.1039/d2nj00049k), 2022-01-01
Supplement: d2nj00049k1.pdf [file d2nj00049k1.pdf]

## Supporting Information

### Improved performance of immobilized laccase for catalytic degradation of synthetic dyes using redox mediators

Zhiguo Li,<sup>‡a</sup> Qingpeng Zhu,<sup>‡a</sup> Zhaofei Liu,<sup>a</sup> Li Sha<sup>a</sup> and Zhiming Chen<sup>\*ab</sup>

<sup>a</sup> School of Chemical and Environmental Engineering, Anhui Polytechnic University, Wuhu 241000, China.

<sup>b</sup> Anhui Laboratory of Functional Coordinated Complexes for Materials Chemistry and Application, Anhui Polytechnic University, Wuhu 241000, China.

\* Corresponding author. E-mail: [zmchen@ahpu.edu.cn](mailto:zmchen@ahpu.edu.cn)

<sup>‡</sup> Authors contributed equally to the publication.

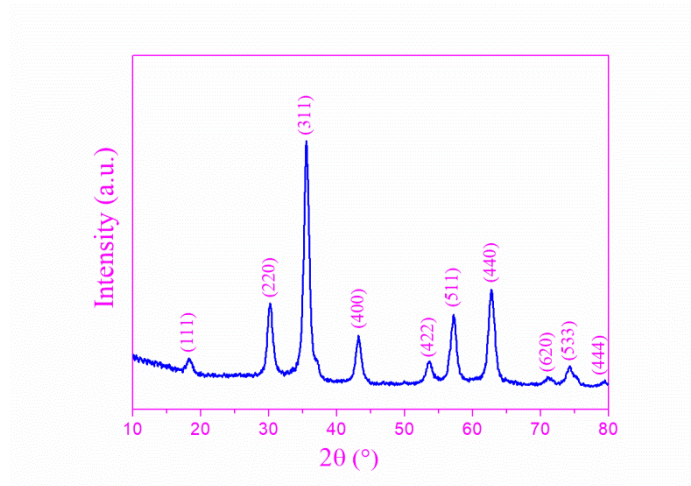

**Fig. S1.** XRD patterns of Fe<sub>3</sub>O<sub>4</sub>-PEG 2000 nanoparticles.

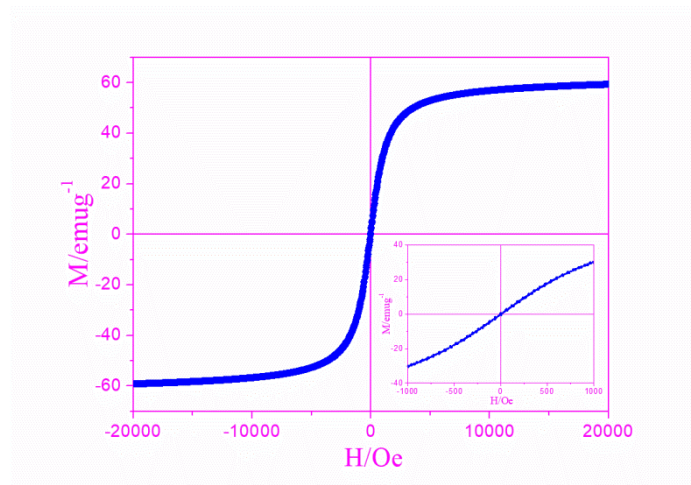

**Fig. S2.** The magnetic hysteresis loop of Fe<sub>3</sub>O<sub>4</sub>-PEG 2000 nanoparticles at 300 K.

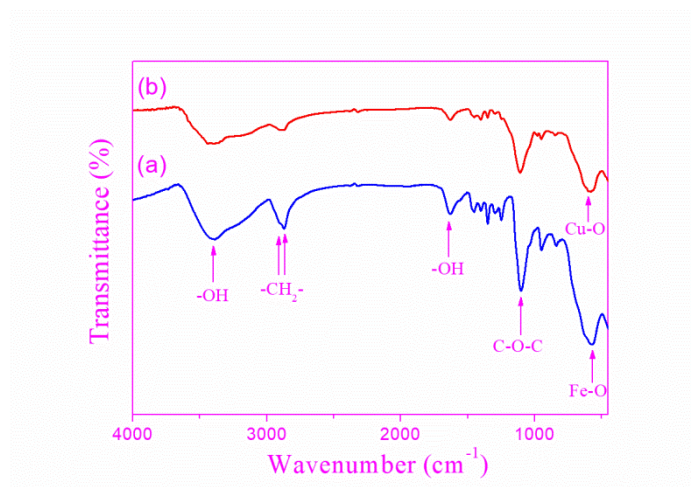

**Fig. S3.** FT-IR spectra of (a) Fe<sub>3</sub>O<sub>4</sub>-PEG 2000 and (b) Fe<sub>3</sub>O<sub>4</sub>-PEG 2000-Cu<sup>2+</sup> nanoparticles.

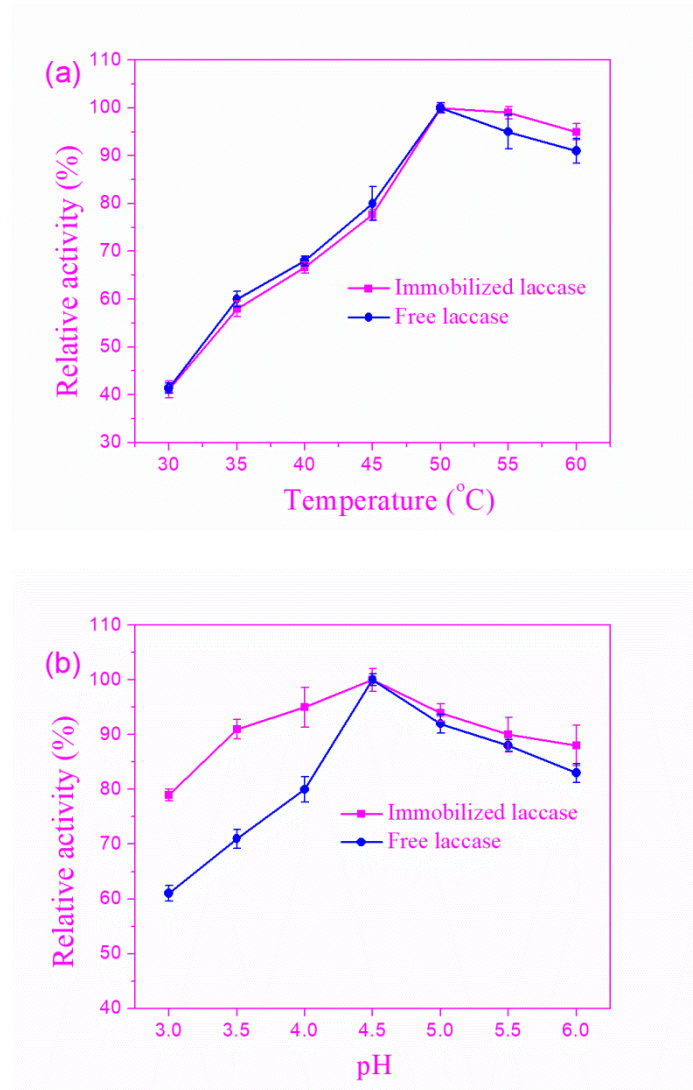

**Fig. S4.** Effects of (a) temperature and (b) pH value on the activities of free and immobilized laccases.

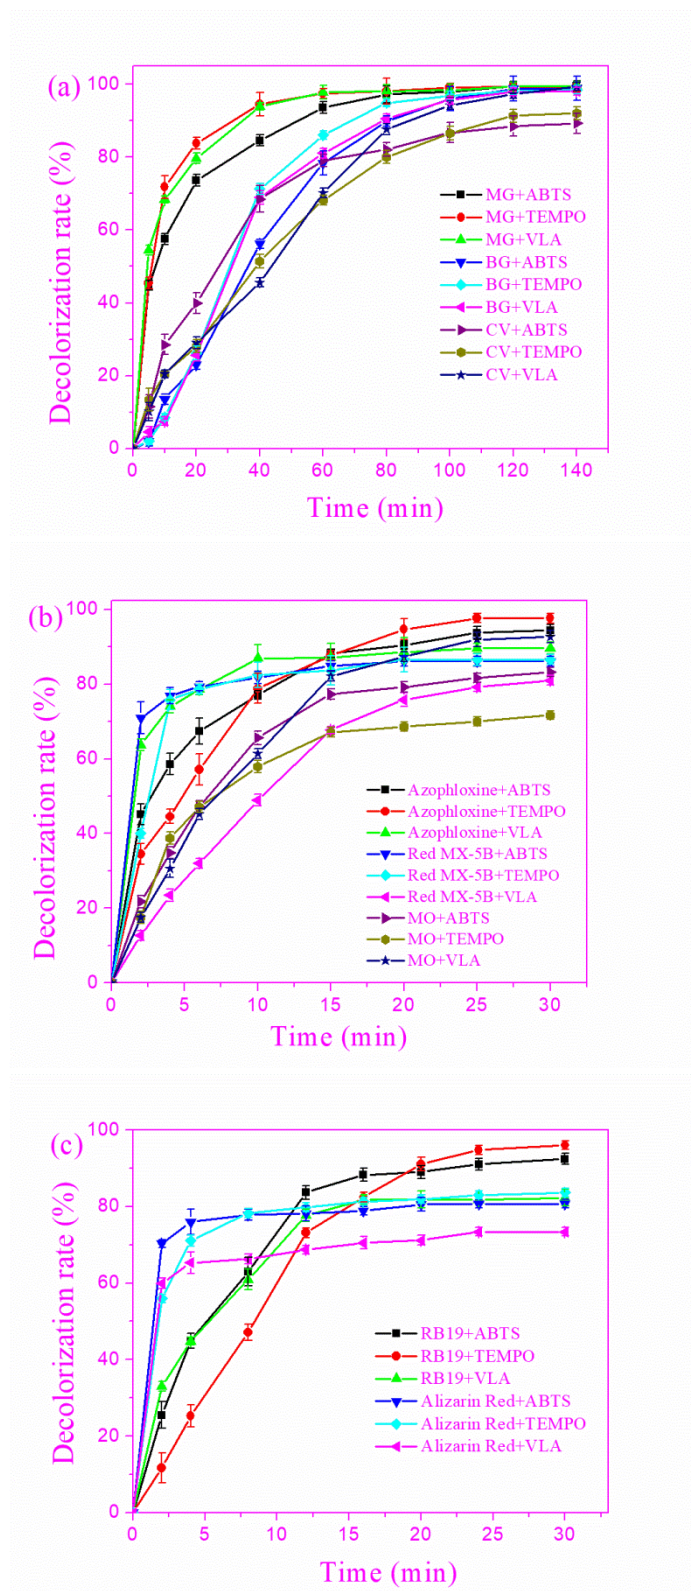

**Fig. S5.** Degradation kinetics of (a) triphenylmethane, (b) azo and (c) anthraquinone dyes by the immobilized laccase in the present of ABTS, VLA and TEMPO mediators at pH 4.5 and 50 °C.
